# Supplementary material for: Turning catalytically inactive human Argonaute proteins into active slicer enzymes
Source: Springer Nature journal article supplement (doi:10.1038/nsmb.2577), 2013-05-12
Supplement: 41594_2013_BFnsmb2577_MOESM1_ESM.pdf [file 41594_2013_BFnsmb2577_MOESM1_ESM.pdf]

```

                                27
Ago1 M---EAGPSGAAAGAYLPPLQQVFQAPRRPGIGTVGKPIKLLANYFEVDIPKIDVYHYEV
Ago2 M-YSGAGPALAPPAPPPPIQGYAFKPPRPDFGTSGRTIKLOANFFEMDIPKIDIYHYEL
Ago3 MEIGSAGPAGAQP-----LLMVPRRPGYGTMGKPIKLLANCFQVEIPKIDVYLYEV
*   ***: * .           : * *. ** *:.*** ** *::*****:* **:

                                64                                100
Ago1 DIKPDKCPRRVNREVVEYMVQHFKPQIFGDRKPVYDGKKNIYVTALPIGNERVDFEVTI
Ago2 DIKPEKCPRRVNREIVEHMQHFKTQIFGDRKPVFDGRKNLYTAMPLPIGRDKVELEVTL
Ago3 DIKPDKCPRRVNREVVDSMVQHFKVTIFGDRRPVYDGKRSLYTANPLPVATTGVDLDVTL
****:*****:*. ***** *****:***:***:***. .**:. *::**:.

                                137                                151                                160
Ago1 PGE-GKDRIFKVSIKWLAIVSWRMLHEALVSGQIPVPLE-----SVQALDVAMRHLA 168
Ago2 PGE-GKDRIFKVSIKWVSCVSLQALHDALSGRLPSVPFE-----TIQALDVVMRHLA 170
Ago3 PEGGGKDRPFKVSIKFVSRVSWHLLHEVLTGRTLPEPLELDKPISTNPVHAVDVVLRHLA 171
*** *** *****: : * * : **:* . . *:* . . :*:**:*:****.

```

**Supplementary Figure 1:** Sequence alignment of the human Ago1, Ago2 and Ago3 N-termini (amino acids 1-170). Positions of chimeric borders are indicated by amino acid numbering according to Ago2. Critical residues of cleavage-competent Ago3 (Mut5) are underlined.

```

      ▼                                     ▼
      cluster 1
Ago1 588 PVIFLGADVTHPPAGDGKKPSITAVVGSMDAHPNRYCATVRVQ RPRQEIIEDLSY MVREL
Ago2 590 PVIFLGADVTHPPAGDGKKPSIAAVVGSMDAHPNRYCATVRVQ QHRQEIIQDLAAMVREL
Ago3 591 PVIFLGADVTHPPAGDGKKPSIAAVVGSMDAHPNRYCATVRVQ RPRQEIIQDLASMVREL
      *****:*****:*****: *****:**: *****

      ▼                                     ▼
      cluster 2
Ago1     LIQFYKSTRFKPTRIIFYRDGV PEGQLPQILHY ELLAIRDACIKLEKDYQPGITYIVVQK 707
Ago2     LIQFYKSTRFKPTRIIFYRDGV SEGQFQQVLHHELLAIREACIKLEKDYQPGITFIVVQK 709
Ago3     LIQFYKSTRFKPTRIIFYRDGV SEGQFRQVLYYELLAIREACISLEKDYQPGITYIVVQK 710
      *****:**: *:*:*:*****:**:*****:*****:*****

```

**Supplementary Figure 2:** Alignment of partial PIWI domains of human Ago1, Ago2 and Ago3. Catalytic residues are indicated by black triangles. The two Ago1-specific clusters are boxed.

**Supplementary Table 1:** Primer sequences. Bold letters indicate Ago2 sequences.

| construct              | orientation | sequence                                                                                    |
|------------------------|-------------|---------------------------------------------------------------------------------------------|
| Ago1                   | fwd         | 5'-TAAT GCGGCCGC ATGGAAGCGGGACCCTCGGGA-3'                                                   |
|                        | rev         | 5'-CGTA GAATTC TCAAGCGAAGTACATGGTGCGC-3'                                                    |
| Ago2                   | fwd         | 5'-TAAT GCGGCCGC <b>ATGTA</b> CTCGGGAGCCGGCCC-3'                                            |
|                        | rev         | 5'-CGTA GAATTC <b>TCAAGCAA</b> AGTACATGGTGCGCA-3'                                           |
| Ago3                   | fwd         | 5'-TAAT GCGGCCGC ATGGAAATCGGCTCCGCAGGAC-3'                                                  |
|                        | rev         | 5'-CGTA GAATTC TTAAGCGAAGTACATTGTGCGTAAGG-3'                                                |
| Ago3-2 PIWI            | fwd/rev     | 5'- ACCTTCTGTGTTCCAGCAACCAGT <b>CATCTTTCTGGGAGCAGACGTCA</b> -3'                             |
| Ago2-3 PIWI            | fwd/rev     | 5'- <b>AGGCCGCCGGTGTTC</b> CAGCAG CCAGTGATCTTTTTGGGAGCCGAT-3'                               |
| MutA                   | rev/fwd     | 5'-CCTCGCATGTCCATACTCCATG <b>GACAGGGGT</b> CGCAATAGCTTTATTC-3'                              |
| MutB                   | rev/fwd     | 5'-GTGGAAGTCTGATTGTCTGTTAGCTT <b>TTAATA</b> CATCTTTIGTCCTGCCACAATG-3'                       |
| MutC                   | rev/fwd     | 5'-CTTCACACATGAAGTGAATTACAGGTTG <b>TGCCTTG</b> AAAAACGCTGTTGCTG-3'                          |
| MutD                   | rev/fwd     | 5'-CAGGTGTGTATTCATGGAGGGCAG <b>GTGCCT</b> CATGACCACGTCCAGG-3'                               |
| Mut1                   | fwd         | 5'-AGACCTGGCTATGGCACCATGG-3'                                                                |
|                        | rev         | 5'- <b>AGGTGGAGGCTGA</b> AGGCATATCC-3'                                                      |
| Mut2                   | fwd         | 5'-CCTGTCCATGCCGTTGATGTGGT-3'                                                               |
|                        | rev         | 5'-TTCCAGTGGCTCAGGCAAGGTC-3'                                                                |
| Mut3                   | fwd         | 5'- <b>CTGCC</b> AGCGTCCCTTTTGAGACGATCCAG GCCGTTGATGTGGTGCTACGAC-3'                         |
|                        | rev         | 5'-CCGTCCTGTCAGTACTTCATGCAG-3'                                                              |
| Mut4                   | fwd         | 5'- <b>CTGCC</b> AGCGTCCCTTTTGAGACGATCCAG GCCGTTGATGTGGTGCTACGAC-3'                         |
|                        | rev         | 5'- <b>CCGCCCTGAAAGTGCATCGTG</b> TAACGCCTGCAAGCTCACGCA AGAGACAAATTTGATTGACACCTTGAAAGGTC-3'  |
| Mut5                   | rev/fwd     | 5'-CCCTGTTCACTCTCCTAGGACACTT <b>CTCTGGCTTGATATCCAATTCATAATGATAG</b> -3'                     |
| Mut6                   | rev/fwd     | 5'-CACAGGAAGTGGATTGGCGGTGTA <b>TAGATTCTTCTGCCGTCAAACACG</b> -3'                             |
| Ago1 DEDH              | fwd         | 5'-CCTGCCTACTATGCCACCTGGTGGC-3' and reverse complement                                      |
| Ago2-1 PIWI            | fwd/rev     | 5'- <b>AGGCCGCCGGTGTTC</b> CAGCAG CCAGTGATATTCCTGGGAGCAGAT-3'                               |
| Ago2-1 PIWI DEDH c11   | fwd         | 5'- <b>ATTCAA</b> AGACTTGGCCGCC ATGGTGCCTGAGCTCCTCATCC-3'                                   |
|                        | rev         | 5'- <b>GATCTCTT</b> GCCGATGTTG CTGTACCCGCACAGTAGCACAG-3'                                    |
| Ago(2-)1 PIWI DEDH c12 | fwd         | 5'-GTGTCTGAAGGCCAG <b>TTCCAGCAGG</b> TACTCCACCAT GAGCTACTGGCCATTC-3' and reverse complement |
| Ago1 N                 | rev/fwd     | 5'-GGGGTGTACCTCATGGATGCCA <b>GGTGCCT</b> CATGACCACGTCCAGG-3'                                |
| Ago1 N(1-64)           | rev/fwd     | 5'-CCGTTGACTCTACGGGGACACTT <b>CTCTGGCTTGATATCCAATTCATAATGATAG</b> -3'                       |
